# Supplementary material for: Effect of Deterpenated Origanum majorana L. Essential Oil on the Physicochemical and Biological Properties of Chitosan/β-Chitin Nanofibers Nanocomposite Films
Source: MDPI journal article supplement (doi:10.3390/polym13091507), 2021-05-07
Supplement: s1 [file s1]

# Effect of Deterpenated *Origanum majorana* L. Essential Oil on the Physicochemical and Biological Properties of Chitosan/ $\beta$ -Chitin Nanofibers Nanocomposite Films

Rut Fernández-Marín <sup>1,\*</sup>, Muhammad Mujtaba <sup>2</sup>, Demet Cansaran-Duman <sup>2</sup>, Ghada Ben Salha <sup>1</sup>, M<sup>a</sup> Ángeles Andrés Sánchez <sup>1</sup>, Jalel Labidi <sup>1</sup> and Susana C. M. Fernandes <sup>3,\*</sup>

<sup>1</sup> Environmental and Chemical Engineering Department, University of the Basque Country UPV/EHU, Plaza Europa 1, 20018 Donostia-San Sebastián, Spain; bensalghadaangle@gmail.com (G.B.S.); marian.andres@ehu.eus (M.Á.A.S.); jalel.labidi@ehu.eus (J.L.)

<sup>2</sup> Institute of Biotechnology, Ankara University, 06110 Ankara, Turkey; mujtaba@ankara.edu.tr, muhammadmujtaba443@gmail.com (M.M.); dcansaran@gmail.com (D.C.-D.)

<sup>3</sup> IPREM, CNRS, Université de Pau et des Pays de l'Adour, E2S UPPA, 64000 Pau, France

\* Correspondence: rut.fernandez@ehu.eus (R.F.-M.); susana.fernandes@univ-pau.fr (S.C.M.F.)

## S1. <sup>13</sup>C NMR of the $\beta$ -Chitin Nanofibres.

**Citation:** Fernández-Marín, R.; Mujtaba, M.; Duman, D.C.; Salha, G.B.; Sánchez, M.Á.A.; Labidi, J.; Fernandes, S.C.M. Effect of Deterpenated *Origanum majorana* L. Essential Oil on the Physicochemical and Biological Properties of Chitosan/ $\beta$ -chitin Nanofibers Nanocomposite Films. *Polymers* **2021**, *13*, 1507. <https://doi.org/10.3390/polym13091507>

Academic Editor: Luminita Marin

Received: 15 April 2021

Accepted: 4 May 2021

Published: 7 May 2021

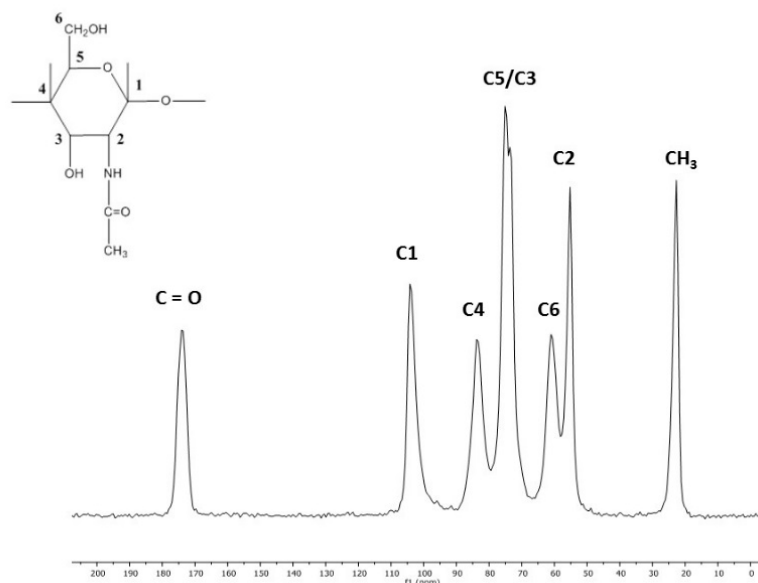

**Figure S1.** <sup>13</sup>C-NMR spectra of  $\beta$ -chitin nanofibres.

## S2. Morphology of the $\beta$ -Chitin Nanofibres.

**Publisher's Note:** MDPI stays neutral with regard to jurisdictional claims in published maps and institutional affiliations.

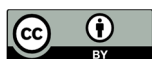

**Copyright:** © 2021 by the authors. Licensee MDPI, Basel, Switzerland. This article is an open access article distributed under the terms and conditions of the Creative Commons Attribution (CC BY) license (<http://creativecommons.org/licenses/by/4.0/>).

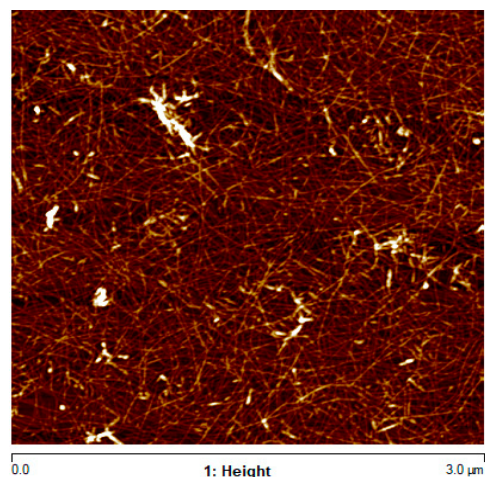

**Figure S2.** AFM images of  $\beta$ -chitin nanofibres.

### S3. Cytotoxicity Assay

#### *Acridine Orange (AO) Staining*

The cells were cultured and were fixed with 4% PFA (paraformaldehyde) for 15 min. After fixation, the cells were stained AO for 30 min and the stained cells were analyzed with the Zoe Cell Imaging System (Biorad, USA).

#### *DAPI Staining*

Cell nuclear morphology was evaluated by fluorescence microscopy following DAPI staining. L929 cells were fixed with ice-cold 70% ethanol and resuspended in DAPI, and incubated for 15 min at 37°C wrapped in aluminum foil. The cells were then washed with PBS and examined under Zoe Cell Imaging System (Biorad, USA).

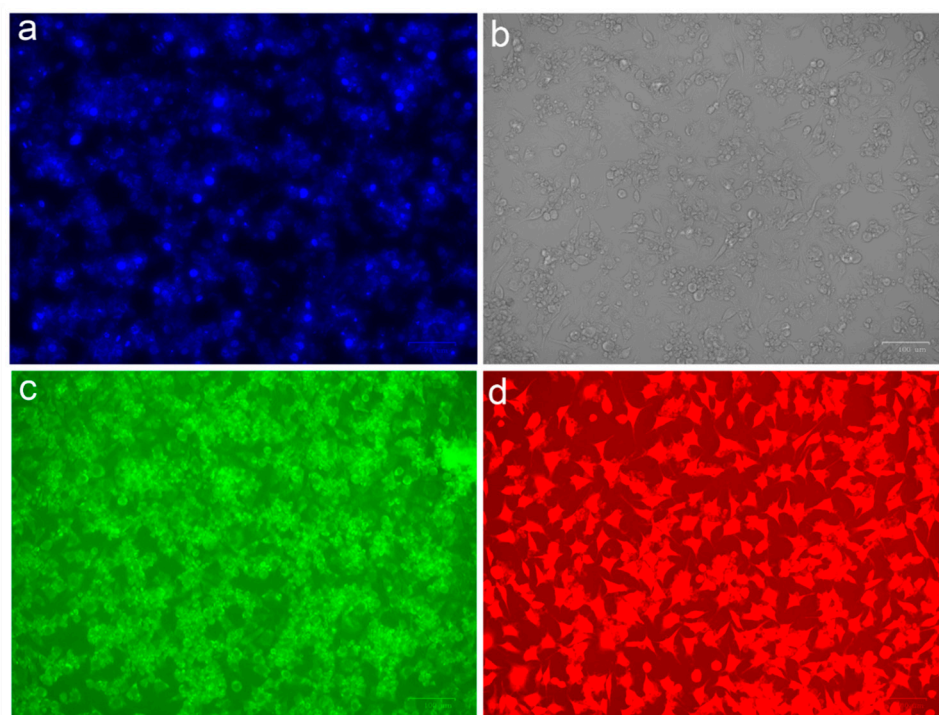

**Figure S3.** a and c) L929 cells by DAPI staining; b) L929 cells using light microscopy; d) L929 cells using by acridine orange (AO) staining.

### S4. Antifungal Activity

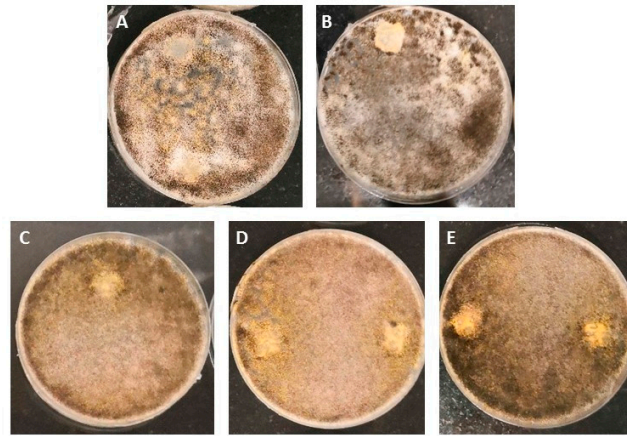

**Figure S4.** The general aspect after 7 days of incubation against *Aspergillus niger*. A) CSNF; B) CSNF-F1; C) CSNF-F2; D) CSNF-F3 and E) CSNF-OM.
